# Supplementary material for: Dipyrrolylquinoxaline difluoroborates with intense red solid-state fluorescence
Source: Royal Society of Chemistry journal article supplement (doi:10.1039/c5dt02012c), 2015-01-01

*Supporting Information for*

# Dipyrrolylquinoxaline Difluoroborates with Intense Red Solid-State Fluorescence

*Changjiang Yu, Erhong Hao\*, Tingting Li, Jun Wang, Wanle Sheng, Yun Wei, Xiaolong Mu and Lijuan Jiao\**

The Key Laboratory of Functional Molecular Solids, Ministry of Education; Anhui Laboratory of Molecule-Based Materials; School of Chemistry and Materials Science, Anhui Normal University, Wuhu, China 241000.

\*To whom correspondence should be addressed.

**E-mail:** [haoehong@mail.ahnu.edu.cn](mailto:haoehong@mail.ahnu.edu.cn); [jiao421@mail.ahnu.edu.cn](mailto:jiao421@mail.ahnu.edu.cn),

## **Contents:**

|                                                                         |            |
|-------------------------------------------------------------------------|------------|
| <b>1. Experimental .....</b>                                            | <b>S2</b>  |
| <b>2. Photophysical spectra .....</b>                                   | <b>S3</b>  |
| <b>3. Crystal packings.....</b>                                         | <b>S8</b>  |
| <b>4. Copies of NMR spectra for all compounds.....</b>                  | <b>S9</b>  |
| <b>5. Copies of high resolution mass spectra for all compounds.....</b> | <b>S15</b> |

## 1. Experimental

**General procedure for the synthesis of Dipyrrolediketone 7-9:** This was synthesized as the reported procedure<sup>6</sup> published. Oxalyl chloride (1.48 ml, 17.5 mmol) and freshly distilled dichloromethane (30 ml) were placed together under an argon atmosphere and stirred. Upon cooling to -78 °C in an acetone/ethanol bath, dry pyridine (3.5 g, 42 mmol) was added, resulting in the formation of a yellow precipitate. To this cooled suspension was added a solution of freshly distilled pyrrole (2.8 ml, 40 mmol) in dichloromethane (25 ml) by drop and drop. The mixture was continued to be stirred for an additional 30 min at -60 °C, and hydrochloric acid (5 M, 35 ml) was added to quench the reaction. The organic phase was extracted, dried, filtered, and evaporated to dryness. The crude mixture was purified by silica gel column (hexane/ EtOAc = 3:1, v/v) to afford a yellow powder.

**Dipyrrolediketone 7** was obtained using oxalyl chloride (1.48 ml, 17.5 mmol) and pyrrole (2.8 ml, 40 mmol) as starting materials, giving a yellow powder in 35% yield (1.1 g). <sup>1</sup>H NMR (300 MHz, DMSO-*d*<sub>6</sub>) δ 12.29 (s, 2H), 7.30 (s, 2H), 6.89 (s, 2H), 6.25 (s, 2H).

**Dipyrrolediketone 8** was obtained using oxalyl chloride (0.74 ml, 8.7 mmol) and 2, 4-methylpyrrole (2 ml, 20 mmol) as starting materials, giving a yellow powder in 42% yield (0.89 g). <sup>1</sup>H NMR (300 MHz, DMSO-*d*<sub>6</sub>) δ 11.65 (s, 2H), 5.83 (s, 2H), 2.19 (s, 6H), 1.96 (s, 6H).

**Dipyrrolediketone 9** was obtained using oxalyl chloride (0.74 ml, 8.7 mmol) and 3-ethyl-2, 4-methylpyrrole (2.6 ml, 20 mmol) as starting materials, giving a yellow powder in 45% yield (1.17 g). <sup>1</sup>H NMR (300 MHz, DMSO-*d*<sub>6</sub>) δ 11.60 (s, 2H), 2.29-2.24 (m, 4H), 2.16 (s, 6H), 1.97-1.87 (m, 6H), 0.94 (t, *J* = 7.2 Hz, 6H).

## 2. Photophysical spectra

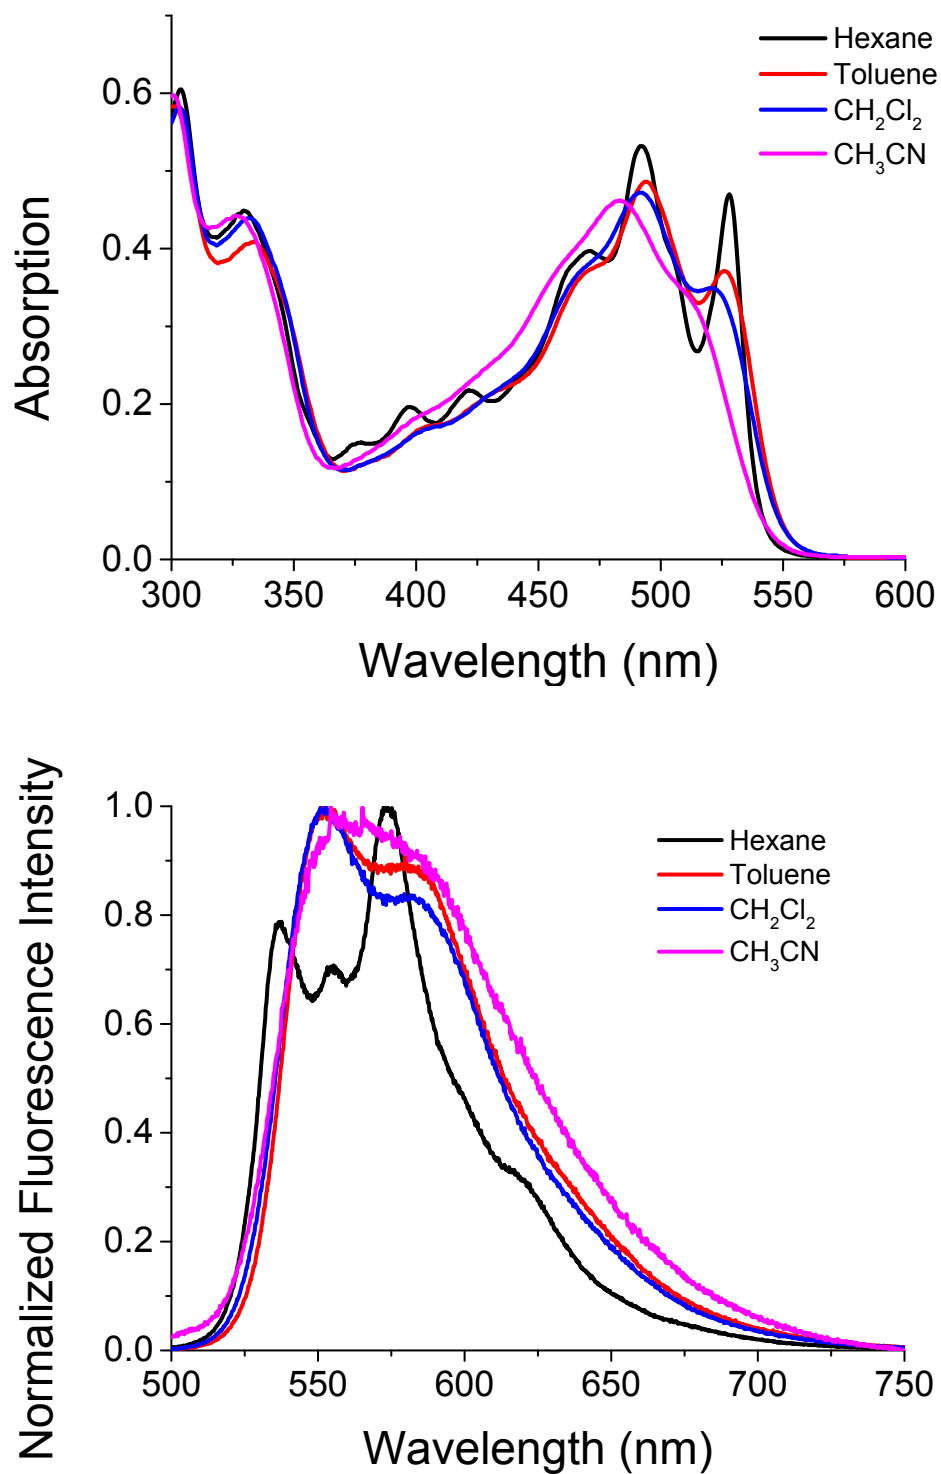

**Figure S1.** Absorption (top) ( $2.8 \times 10^{-5}$  M) and emission (bottom) spectra of **1** recorded in different solvents, excited at 400 nm.

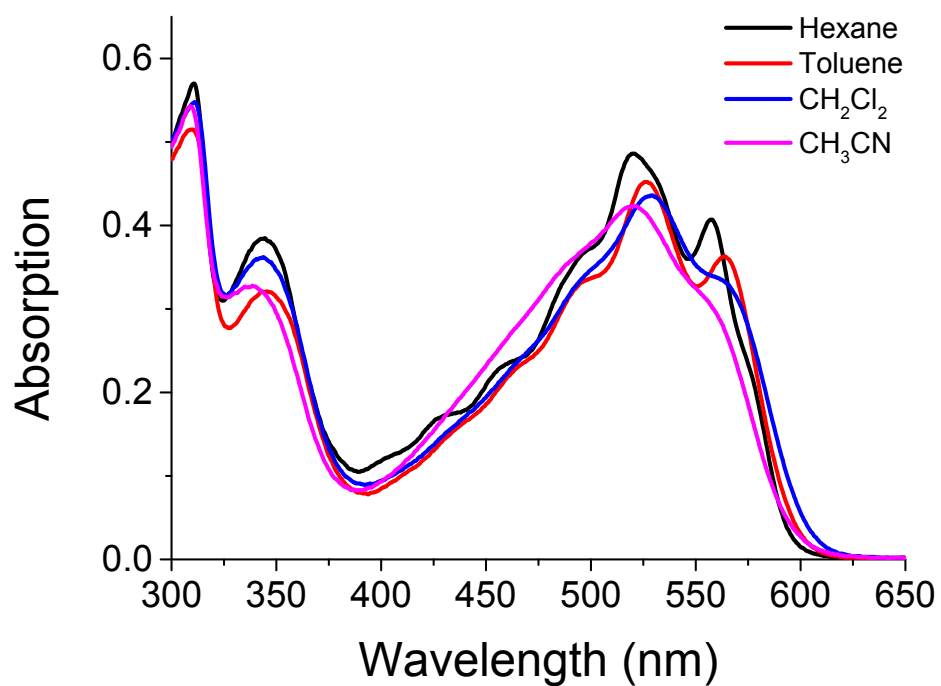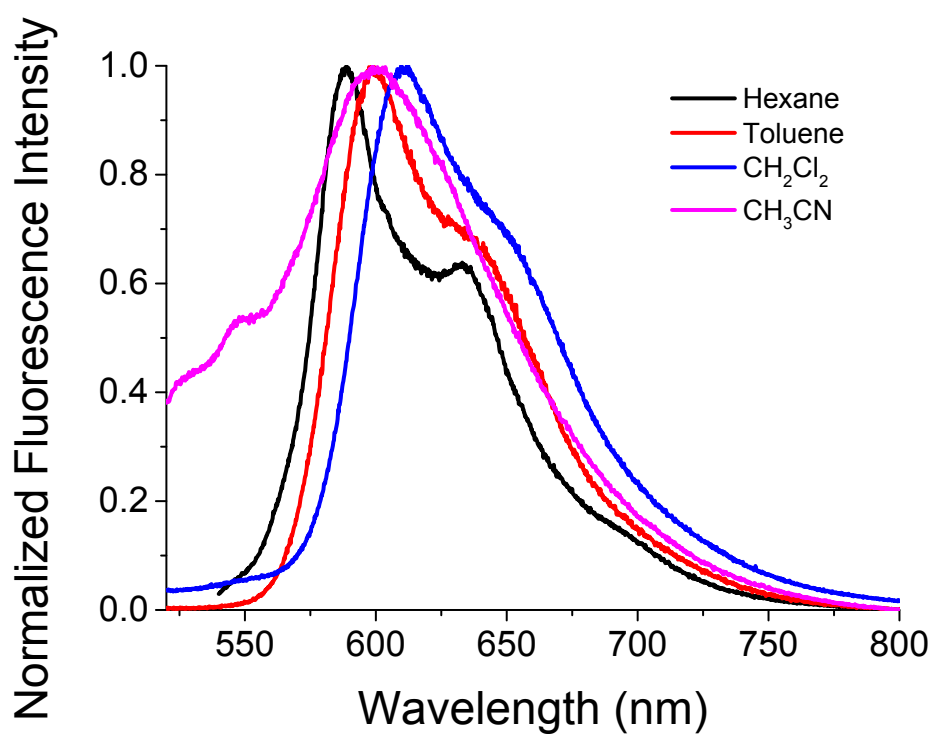

**Figure S2.** Absorption (top) ( $9.9 \times 10^{-6}$  M) and emission (bottom) spectra of **2** recorded in different solvents, excited at 500 nm.

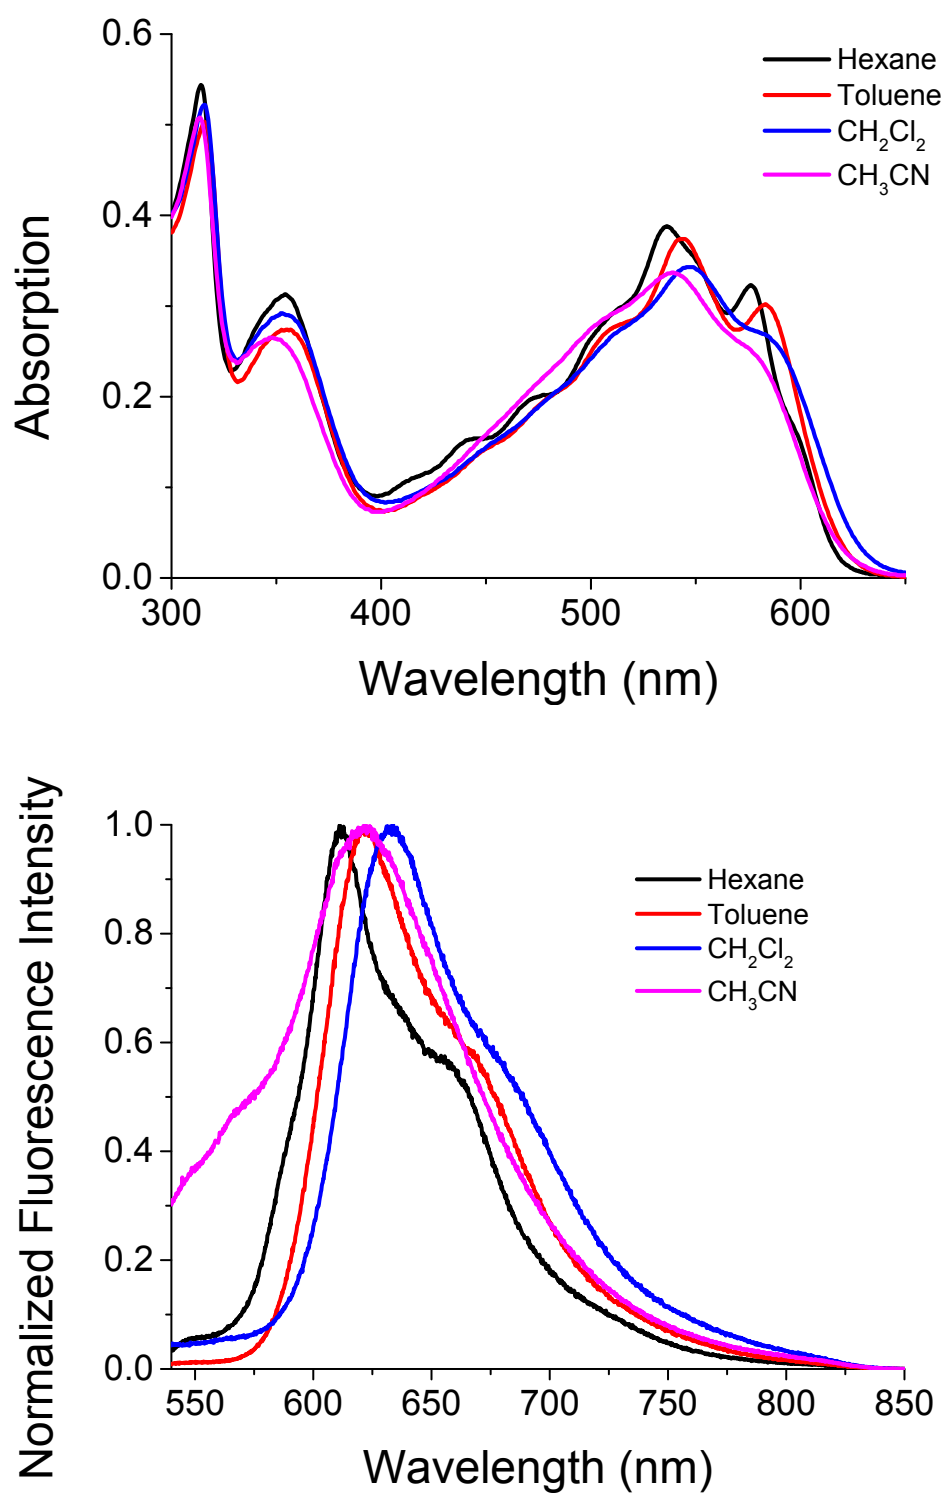

**Figure S3.** Absorption (top) ( $1.4 \times 10^{-5}$  M) and emission (bottom) spectra of **3** recorded in different solvents, excited at 520 nm.

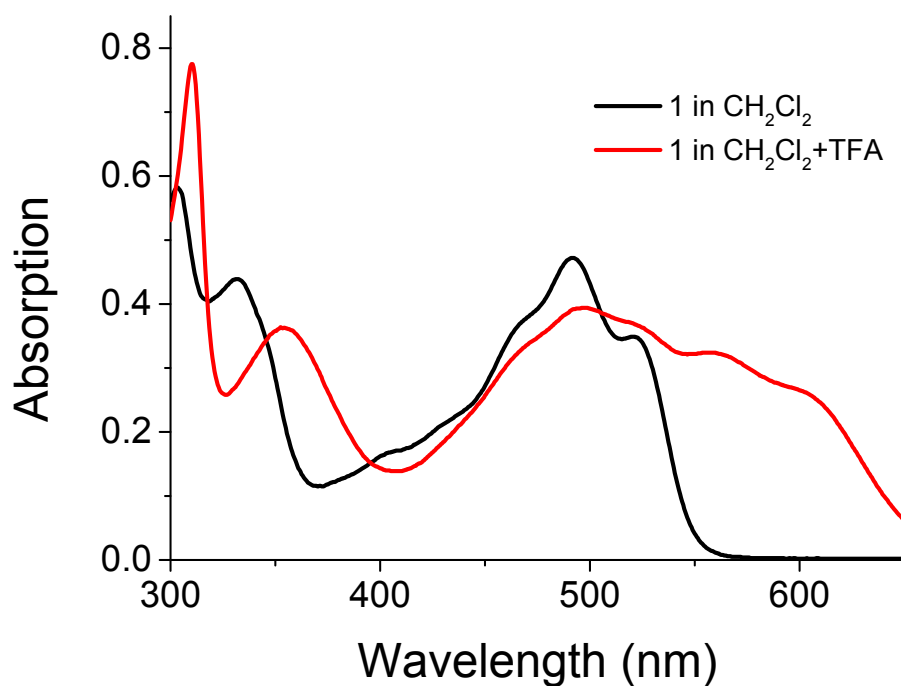

**Figure S4.** Absorption spectra changes of **1** in dichloromethane ( $2.8 \times 10^{-5}$  M) after adding TFA. (TFA: trifluoroacetic acid).

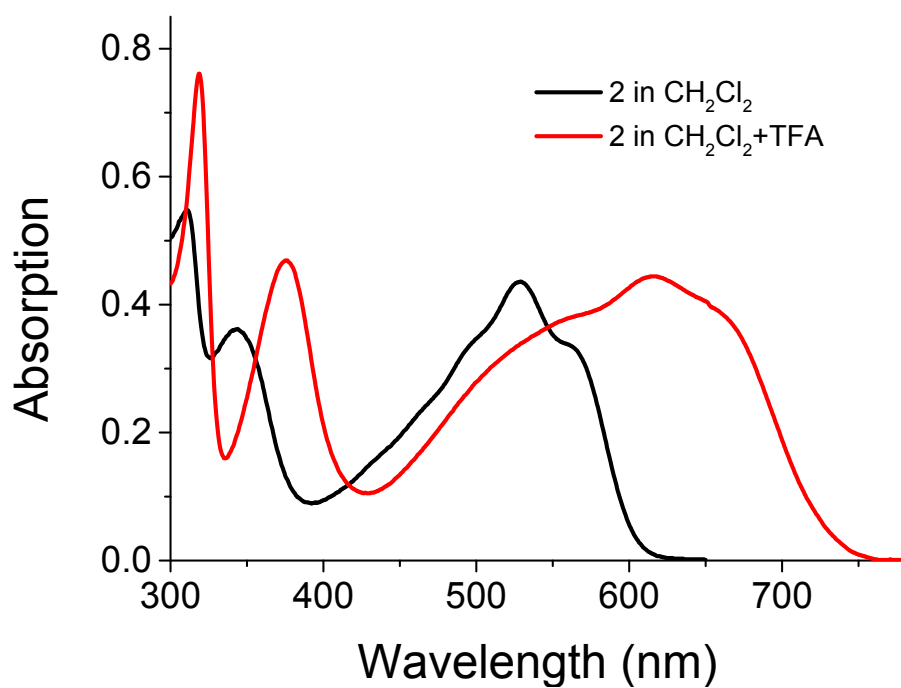

**Figure S5.** Absorption spectra changes of **2** in dichloromethane ( $9.9 \times 10^{-6}$  M) after adding TFA.

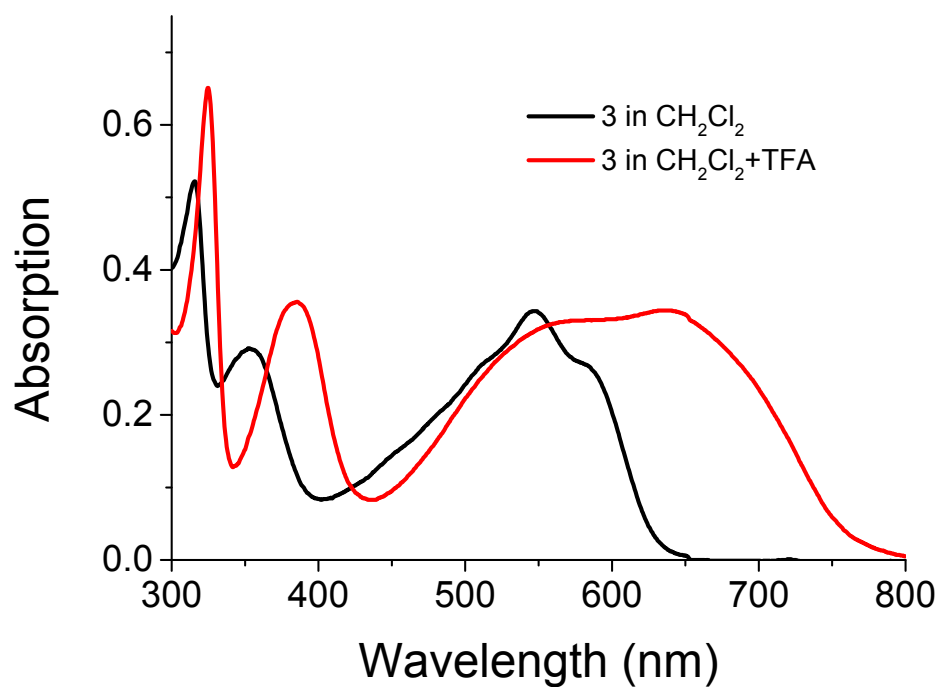

**Figure S6.** Absorption spectra changes of **3** in dichloromethane ( $1.4 \times 10^{-5}$  M) after adding TFA.

### 3. Crystal packings

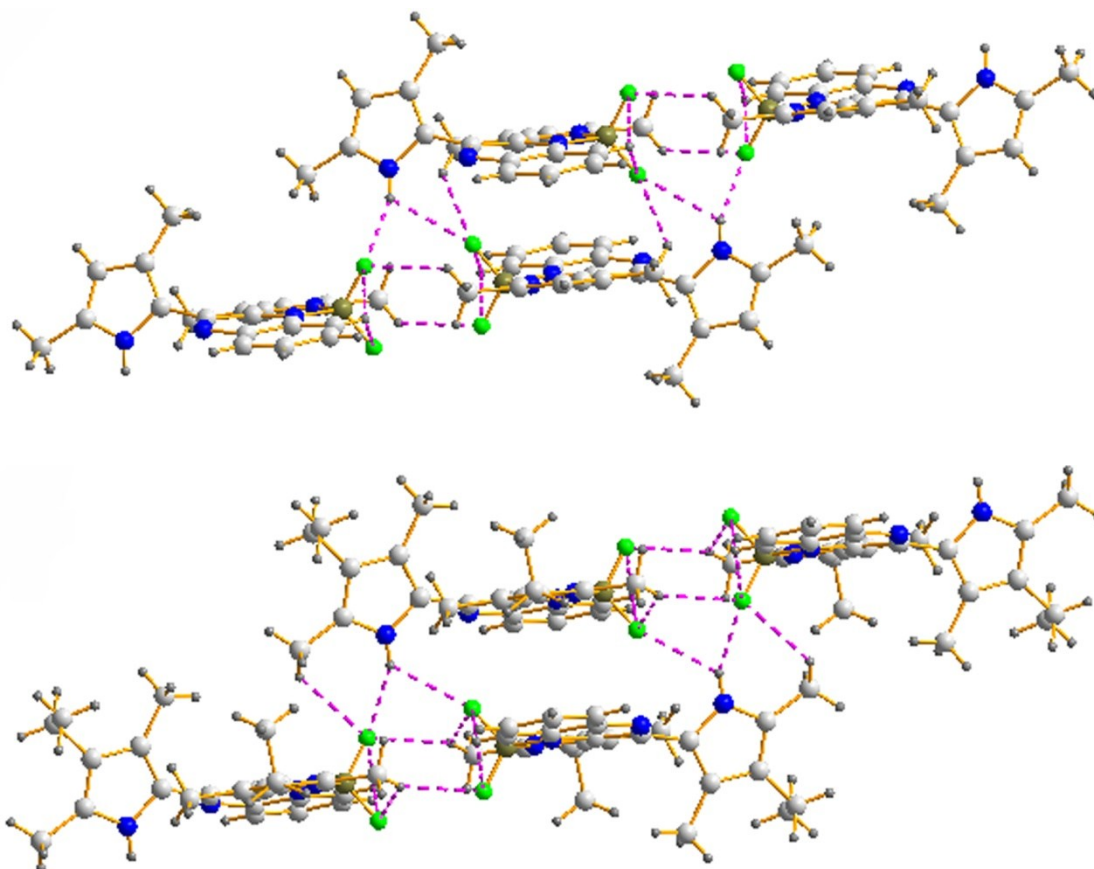

**Figure S7.** Crystal packings of **2** (top) and **3** (bottom).

**Table S1.** Selected geometrical parameters for BPQs **2-3** and PQs **4-5** obtained from crystallography

|                                                                                               | <b>2</b>              | <b>3</b>              | <b>4</b>             | <b>5</b>            |
|-----------------------------------------------------------------------------------------------|-----------------------|-----------------------|----------------------|---------------------|
| the B-N bond distances (Å)                                                                    | 1.527(2),<br>1.607(2) | 1.507(5),<br>1.593(5) |                      |                     |
| dihedral angles between the free pyrrole plane and BN <sub>2</sub> C <sub>2</sub> plane (deg) | 70.64(5)              | 72.82(4)              |                      |                     |
| dihedral angles between pyrrole and pyrazine plane (deg)                                      | 66.09(2),<br>10.08(4) | 68.6(2),<br>6.3(2)    | 86.11(1),<br>5.61(2) | 35.6(1),<br>40.6(2) |
| dihedral angles of two pyrrole planes (deg)                                                   | 74.09(5)              | 73.8(2)               | 88.43(5)             | 66.6(2)             |



## 4. Copies of NMR spectra for all compounds

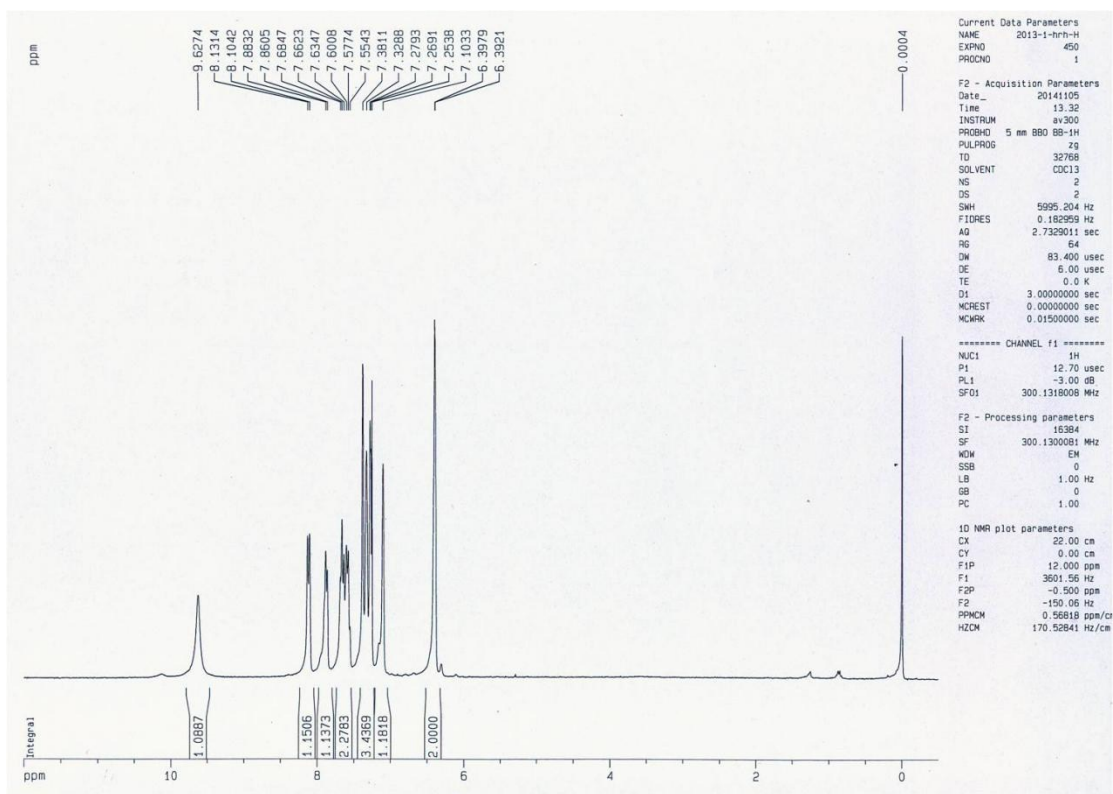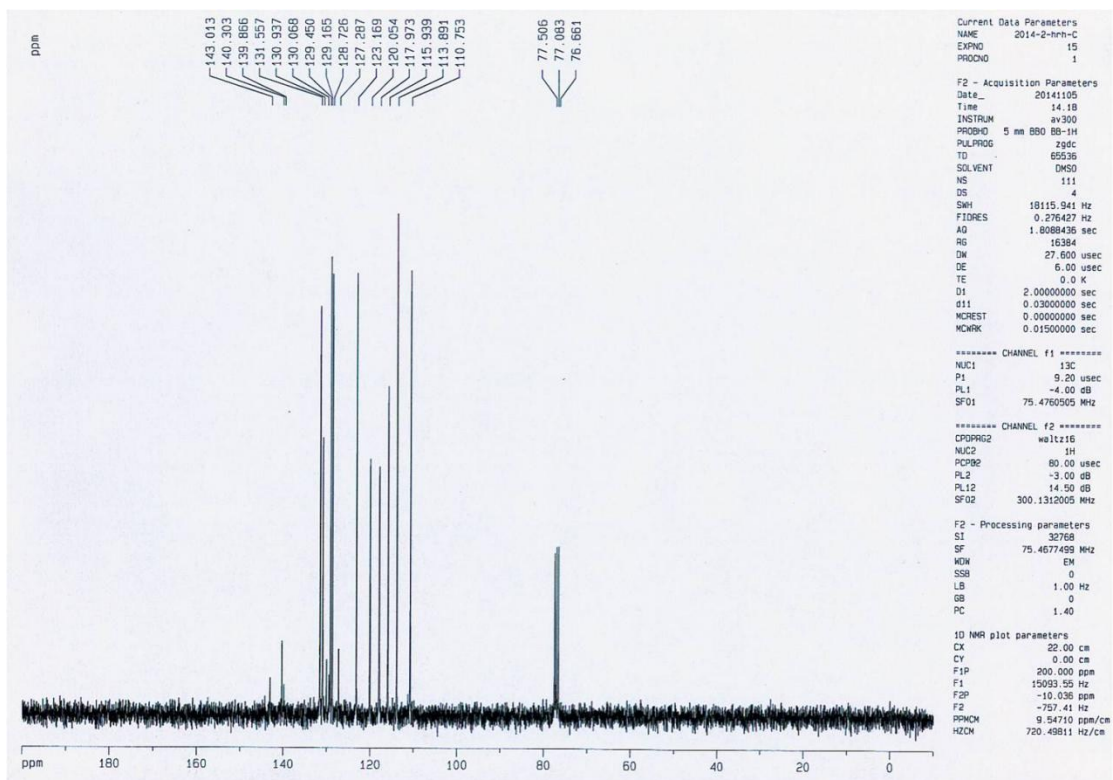

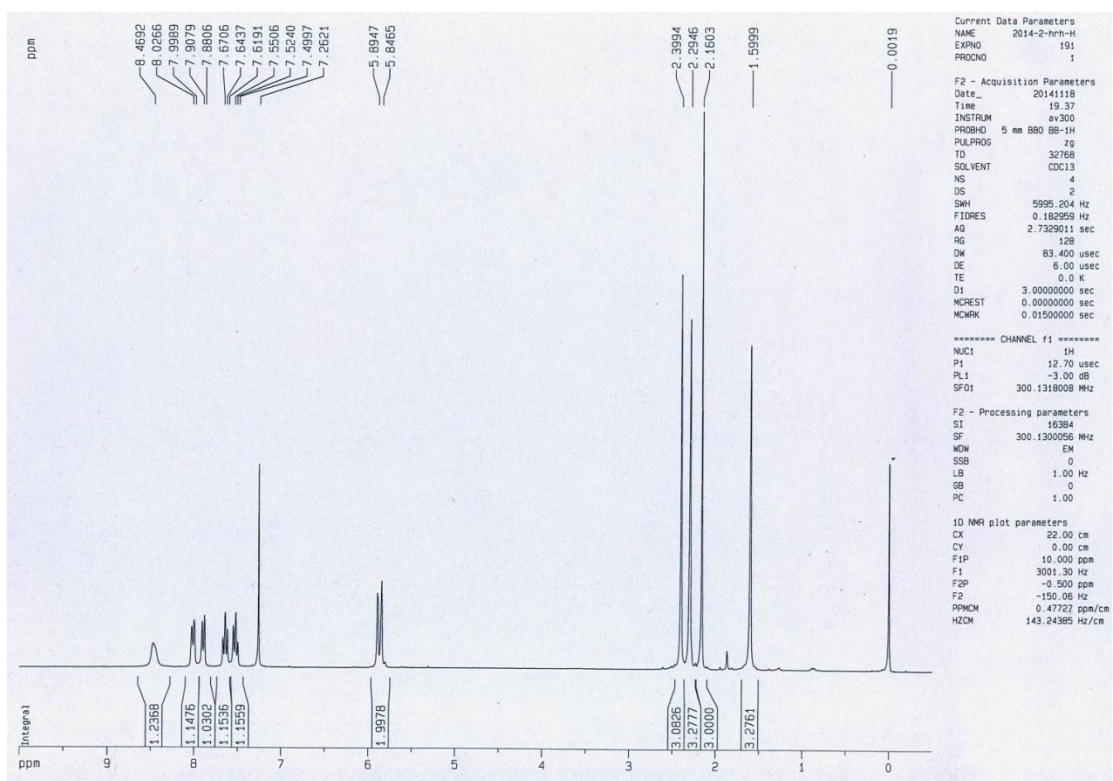

$^1\text{H}$  NMR spectrum of **2** in  $\text{CDCl}_3$

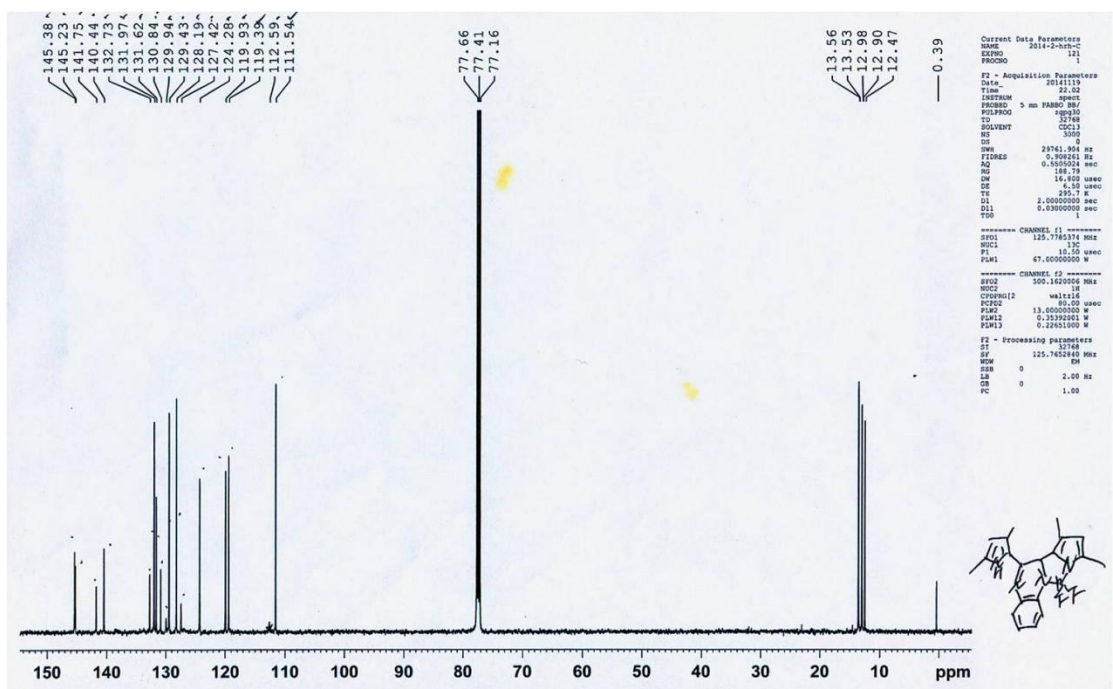

$^{13}\text{C}$  NMR spectrum of **2** in  $\text{CDCl}_3$

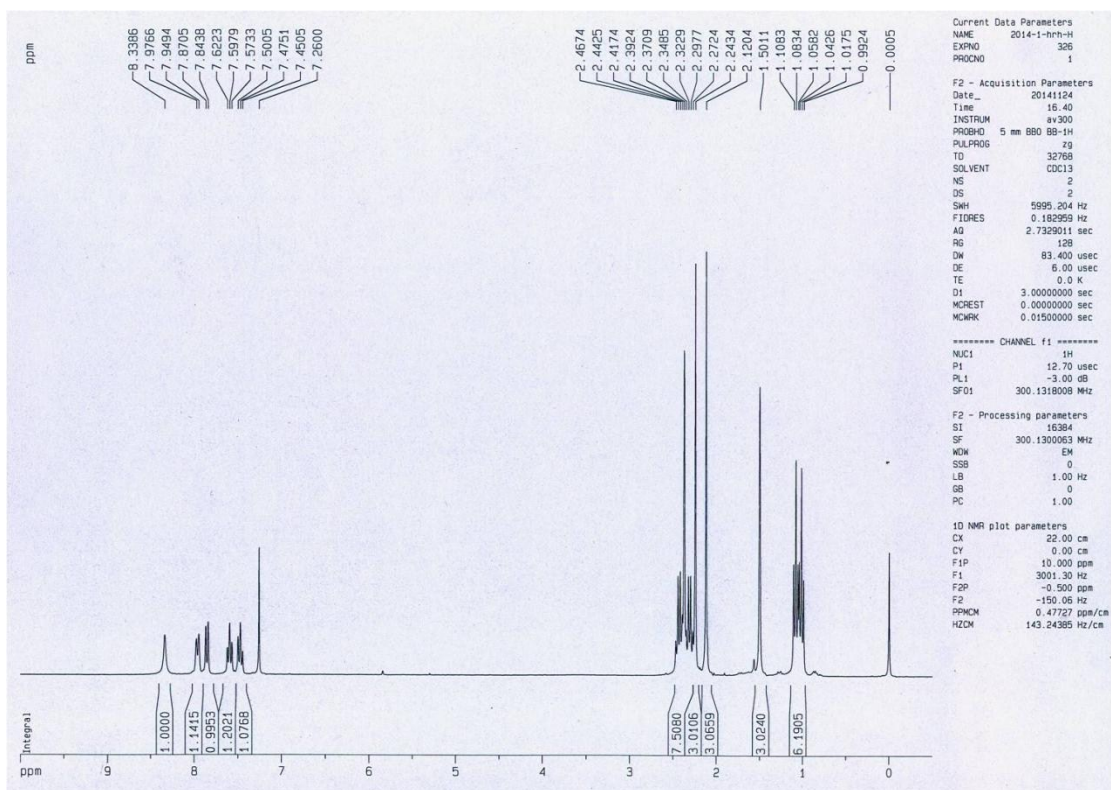

$^1\text{H}$  NMR spectrum of **3** in  $\text{CDCl}_3$

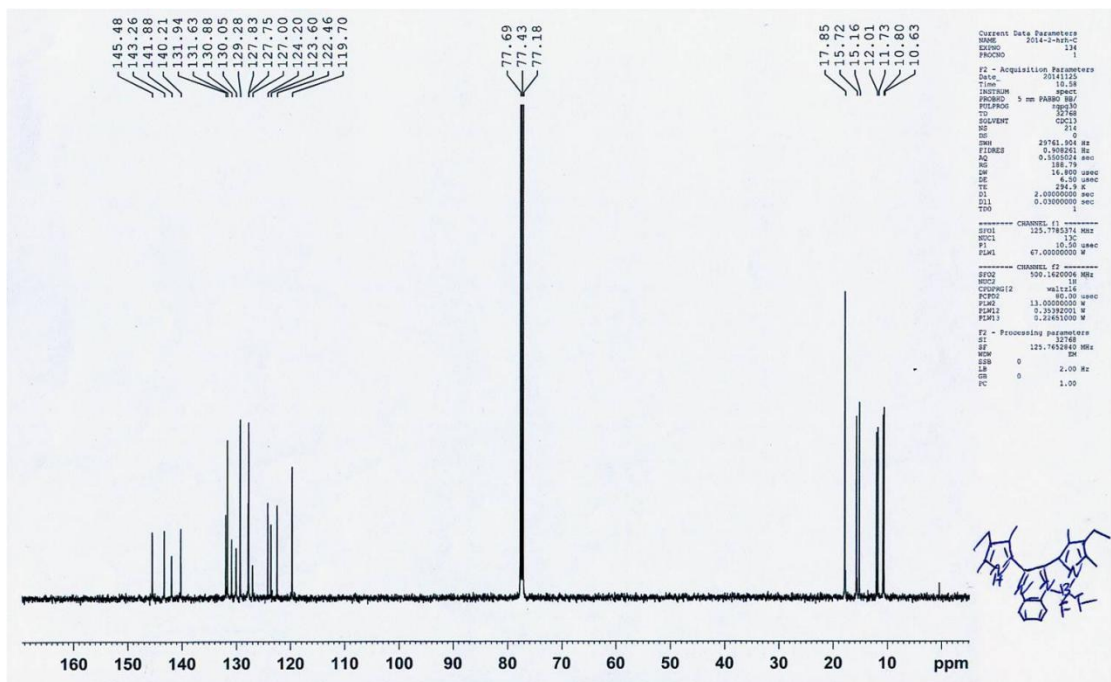

$^{13}\text{C}$  NMR spectrum of **3** in  $\text{CDCl}_3$



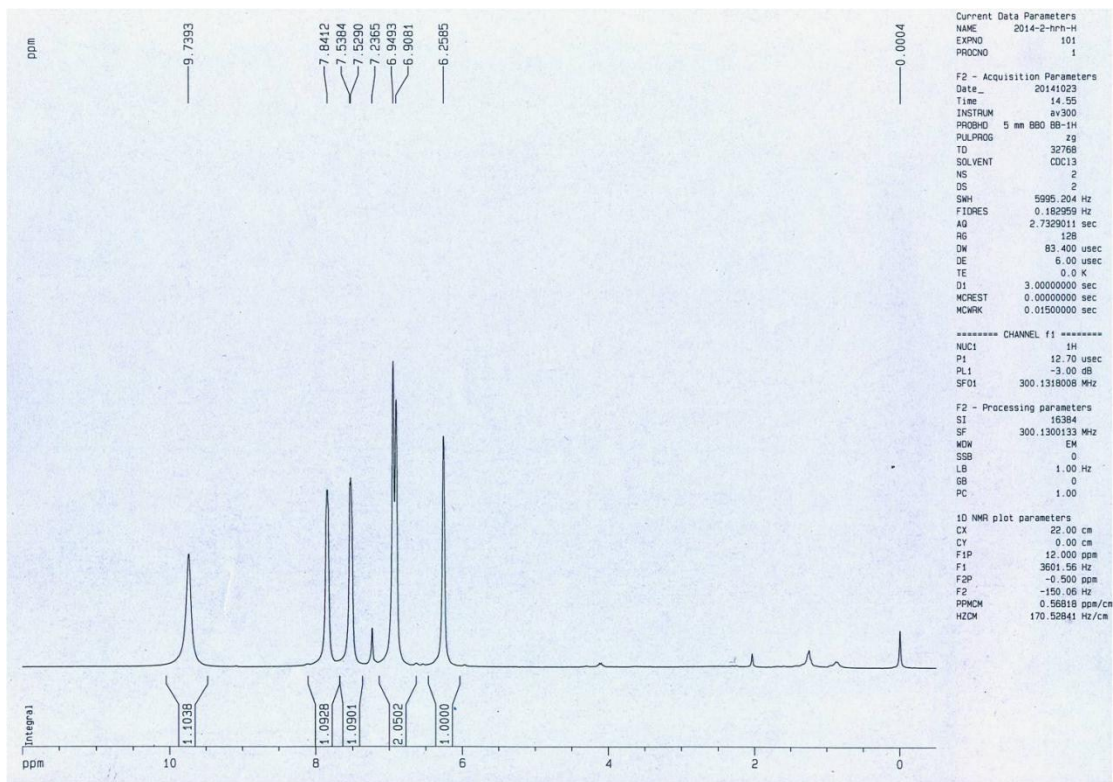

$^1\text{H}$  NMR spectrum of **4** in  $\text{CDCl}_3$

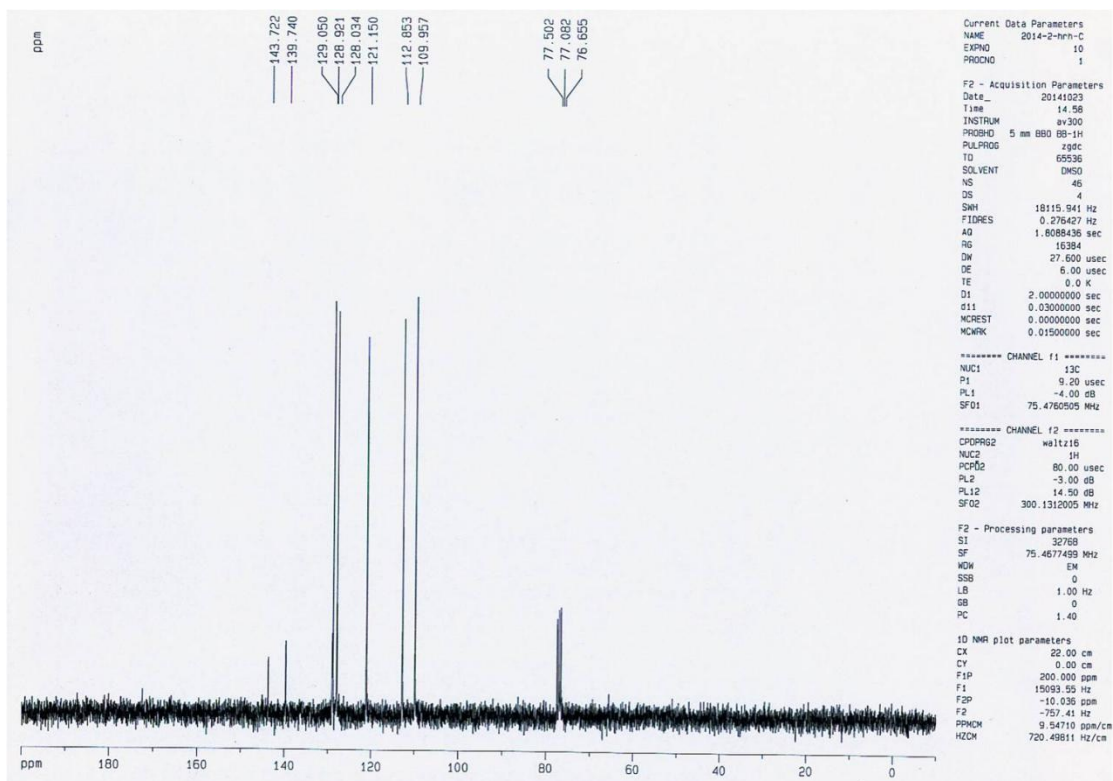

$^{13}\text{C}$  NMR spectrum of **4** in  $\text{CDCl}_3$

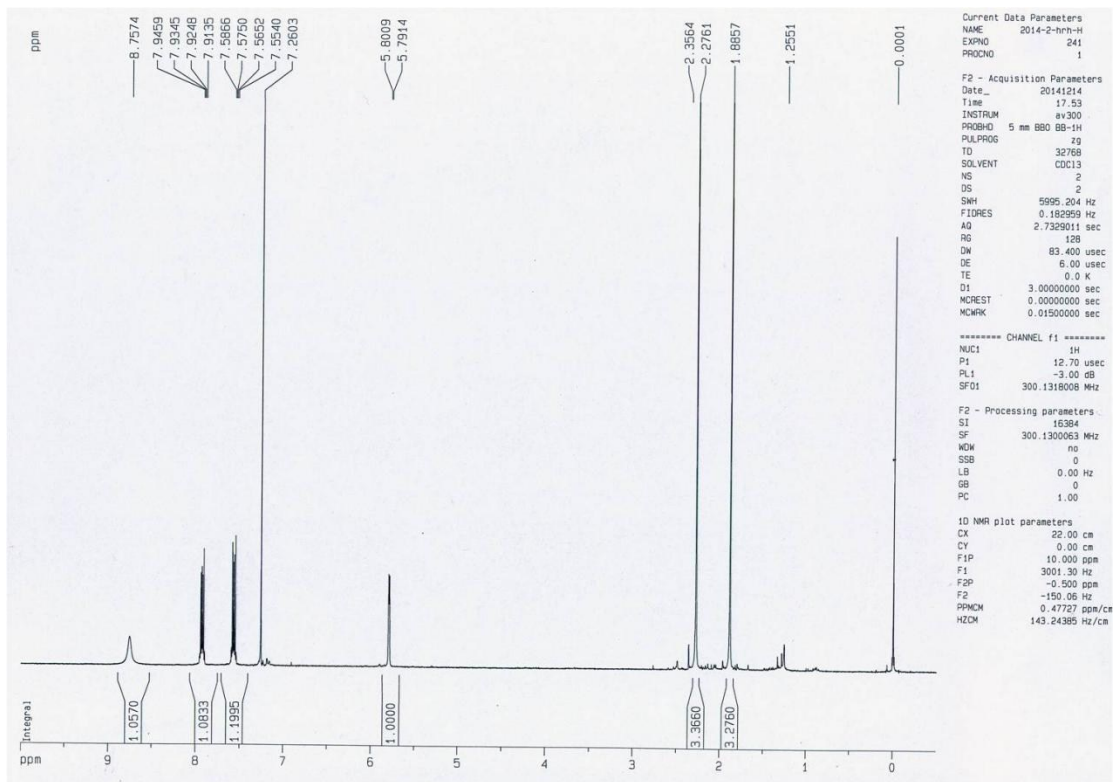

<sup>1</sup>H NMR spectrum of **5** in CDCl<sub>3</sub>

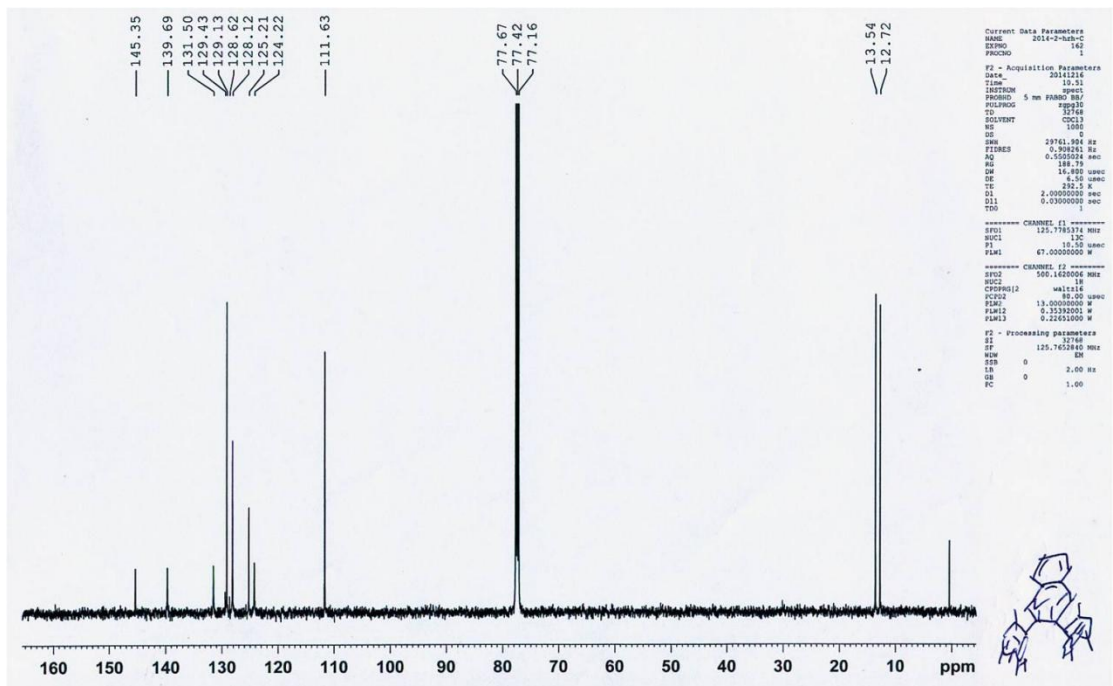

<sup>13</sup>C NMR spectrum of **5** in CDCl<sub>3</sub>

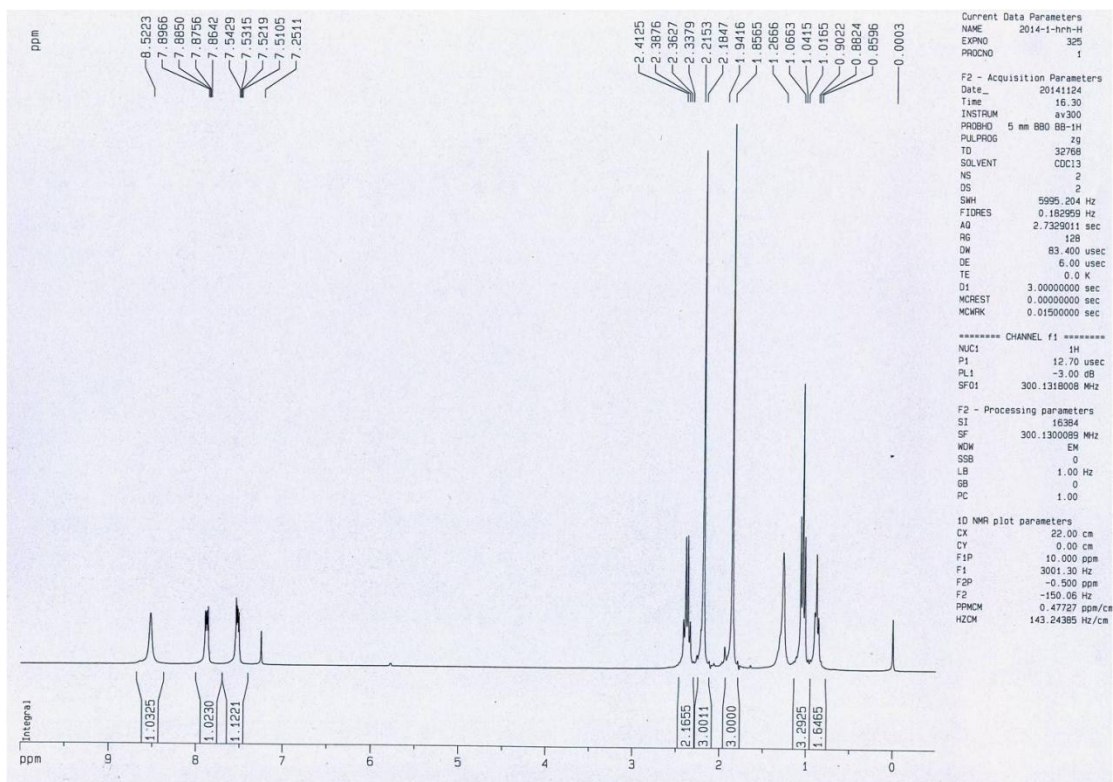

$^1\text{H}$  NMR spectrum of **6** in  $\text{CDCl}_3$

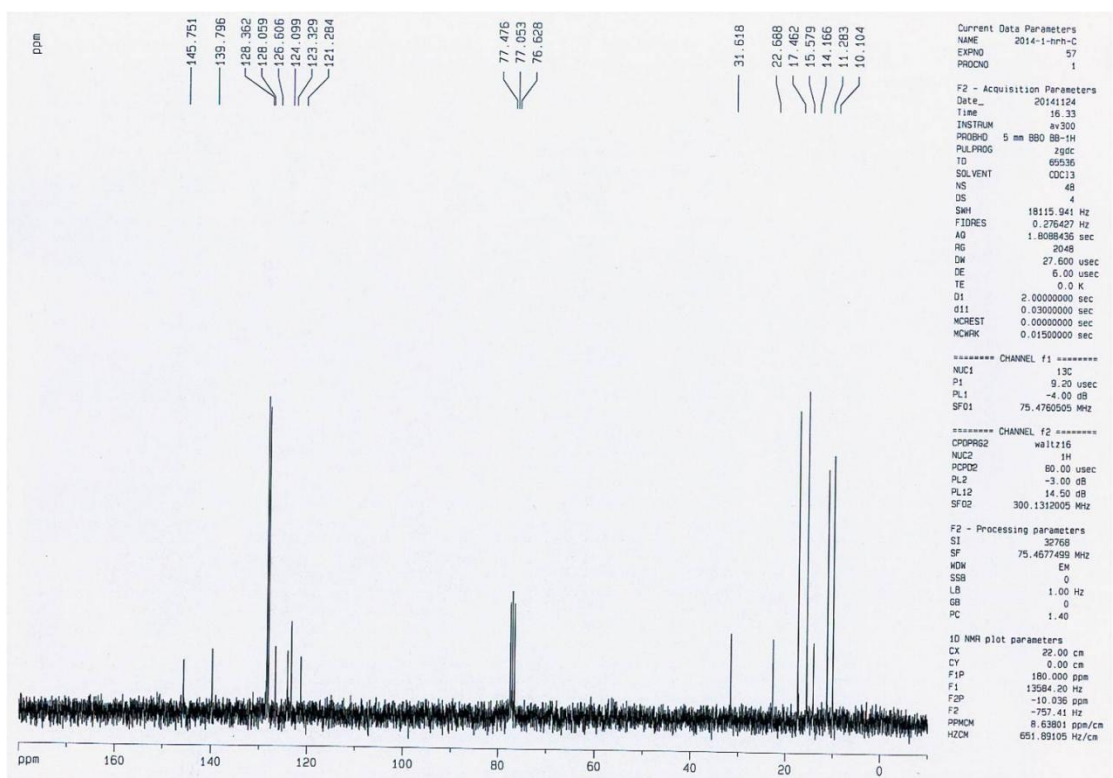

$^{13}\text{C}$  NMR spectrum of **6** in  $\text{CDCl}_3$

## 5. Copies of high resolution mass spectra for all compounds

### HRMS for 1

20141231\_APCI+Y9 #8 RT: 0.11 AV: 1 NL: 4.67E7  
T: FTMS + cAPCI corona Full ms [200.00-600.00]

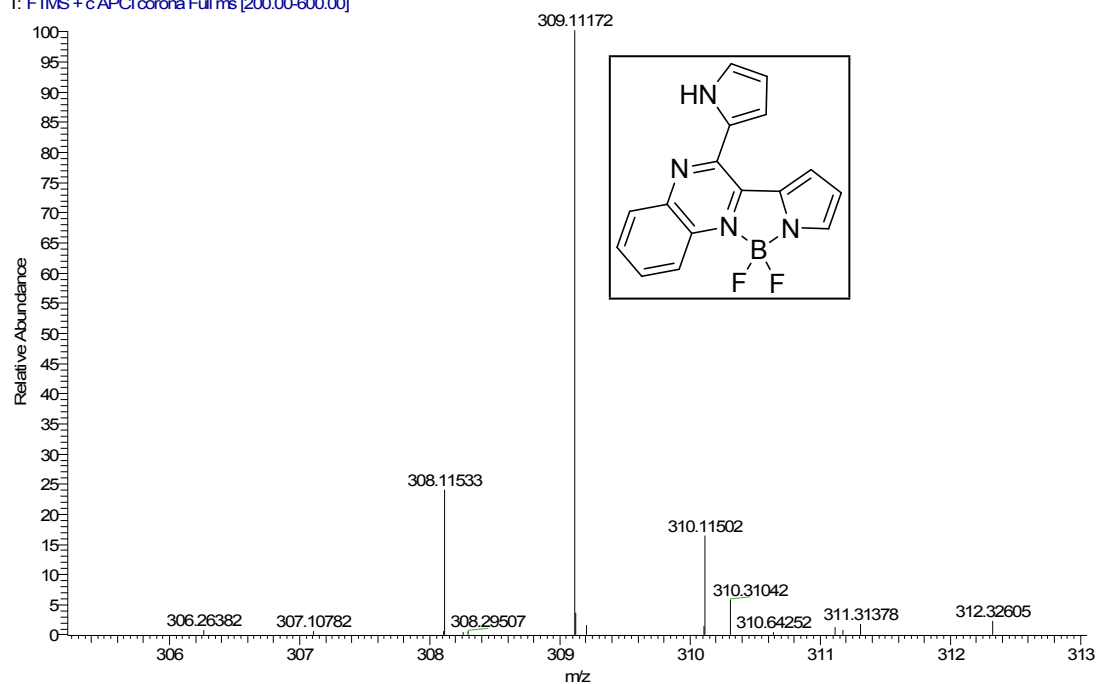

### HRMS for 2

20141230\_APCI+Y10 #10 RT: 0.13 AV: 1 NL: 3.17E5  
T: FTMS + cAPCI corona Full ms [200.00-1000.00]

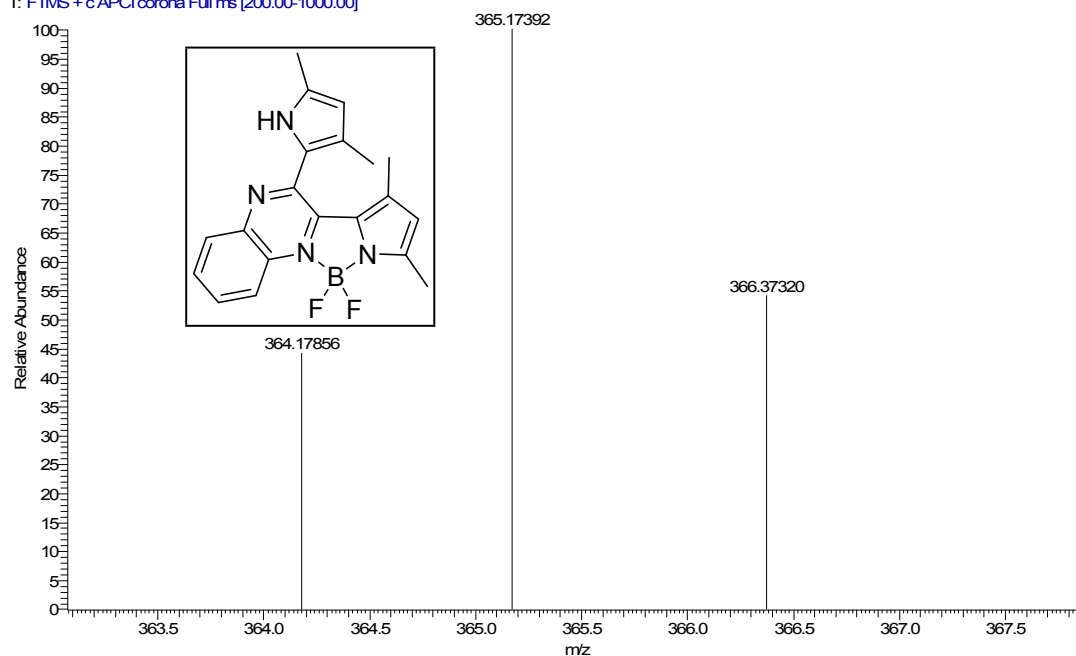

### HRMS for 3

20141230\_APCI+Y11 #7 RT: 0.09 AV: 1 NL: 5.32E5  
T: FTMS + c.APCI corona Full ms [200.00-1000.00]

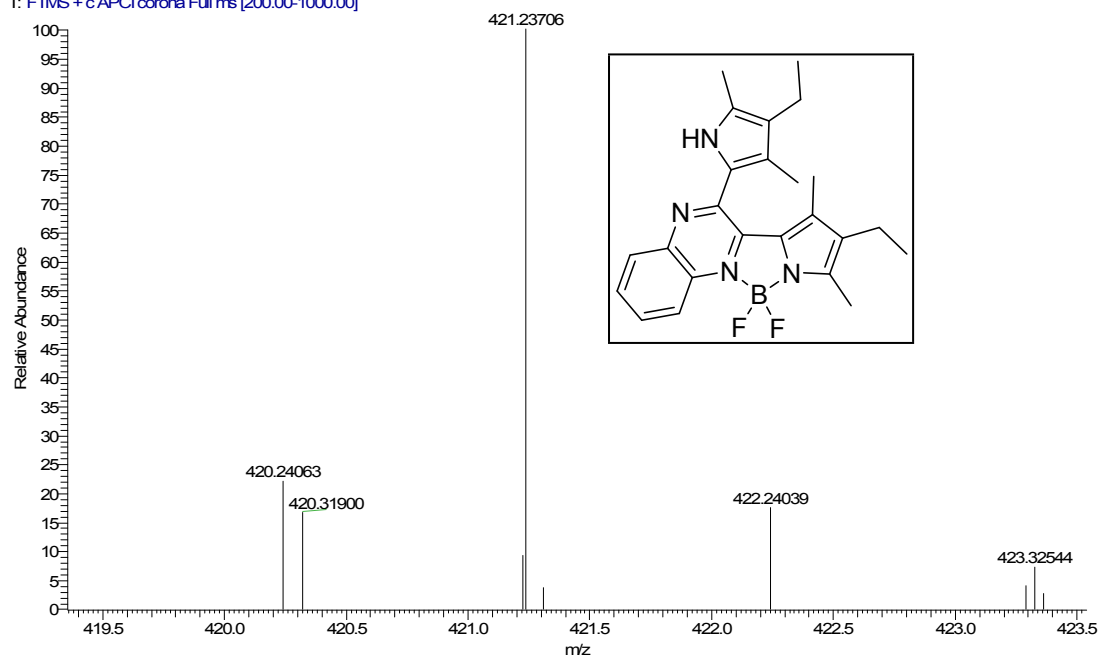

### HRMS for 5

20141230\_APCI+Y12 #26 RT: 0.37 AV: 1 NL: 3.05E7  
T: FTMS + c.APCI corona Full ms [200.00-1000.00]

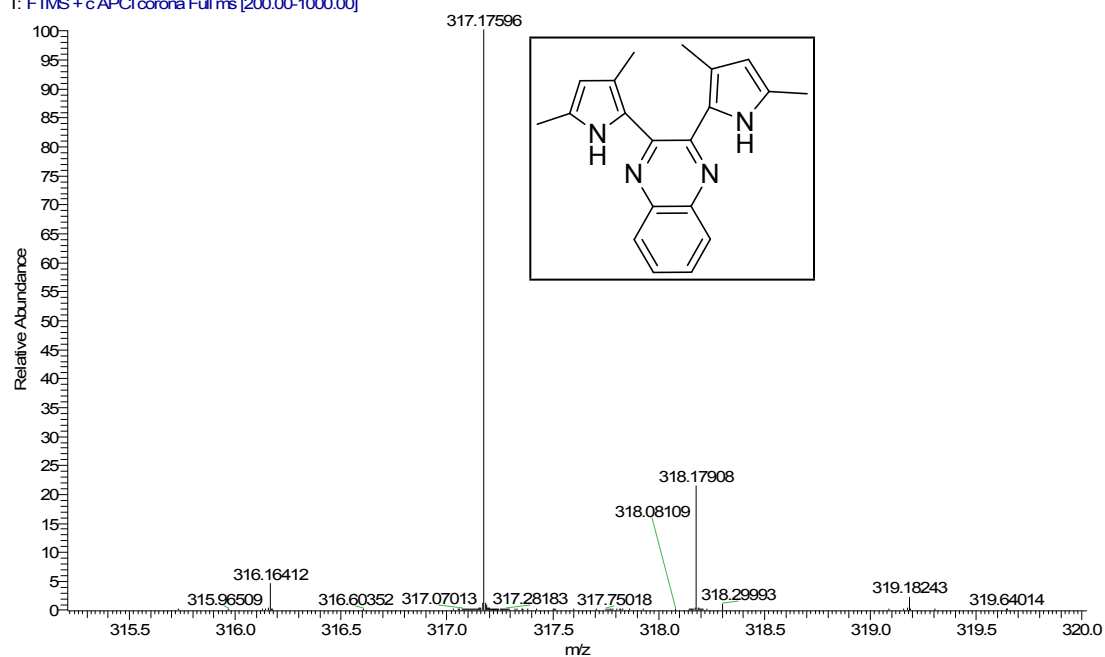



# HRMS for 6

20141230\_APCI+Y13 #8 RT: 0.11 AV: 1 NL: 1.58E8  
T: FTMS + cAPCI corona Full ms [200.00-1000.00]

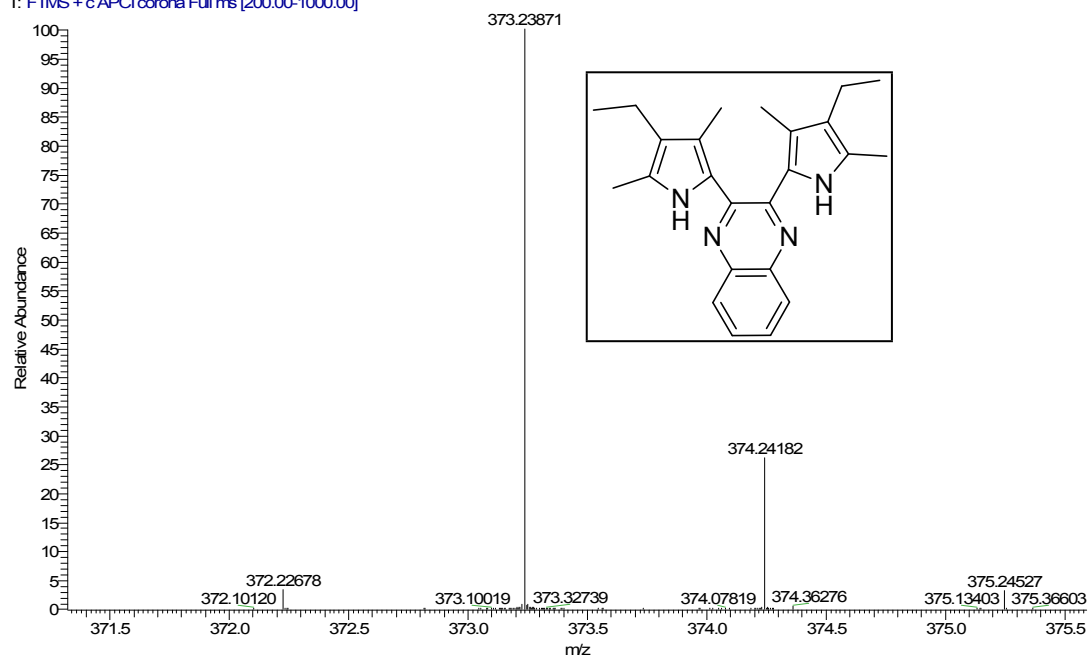

Supplement: c5dt02012c1.pdf [file c5dt02012c1.pdf]
